# Supplementary material for: A machine learning-guided adaptive algorithm to reduce the computational cost ofatmospheric chemistry in Earth System models: application to GEOS-Chemversions 12.0.0 and 12.9.1
Source: Copernicus journal article supplement (doi:10.5194/gmd-2020-425), 2021-02-16
Supplement: Supplementary file 1 [file gmd-2020-425-supplement-version7.pdf]

1

## Supplementary materials

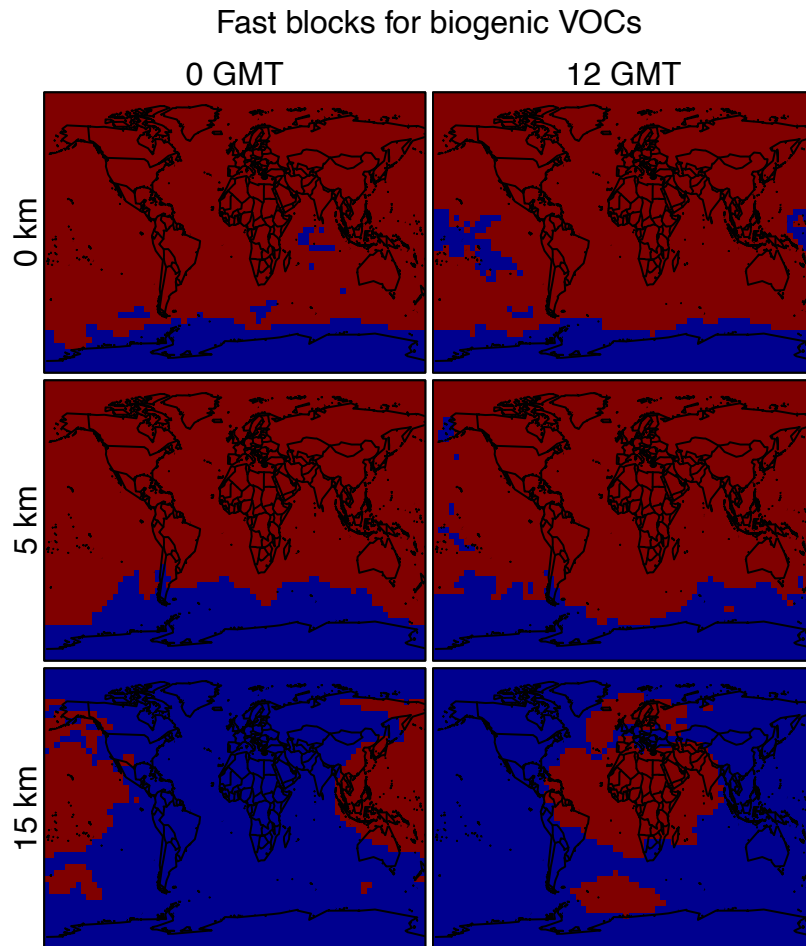

2

3 **Fig. S1.** Locations of anthropogenic blocks (block 5-7) that need to be solved as fast (red color). If any of block 5-7 is fast, the  
4 gridbox will be labeled as red. Results are shown on August 1 2013 at 0 and 12 GMT using a threshold  $\delta$  of 500 molecules  $\text{cm}^{-3}$   
5  $\text{s}^{-1}$  to define the fast and slow species, and a lifetime of 10 days to define the short-lived and long-lived species.

6

7

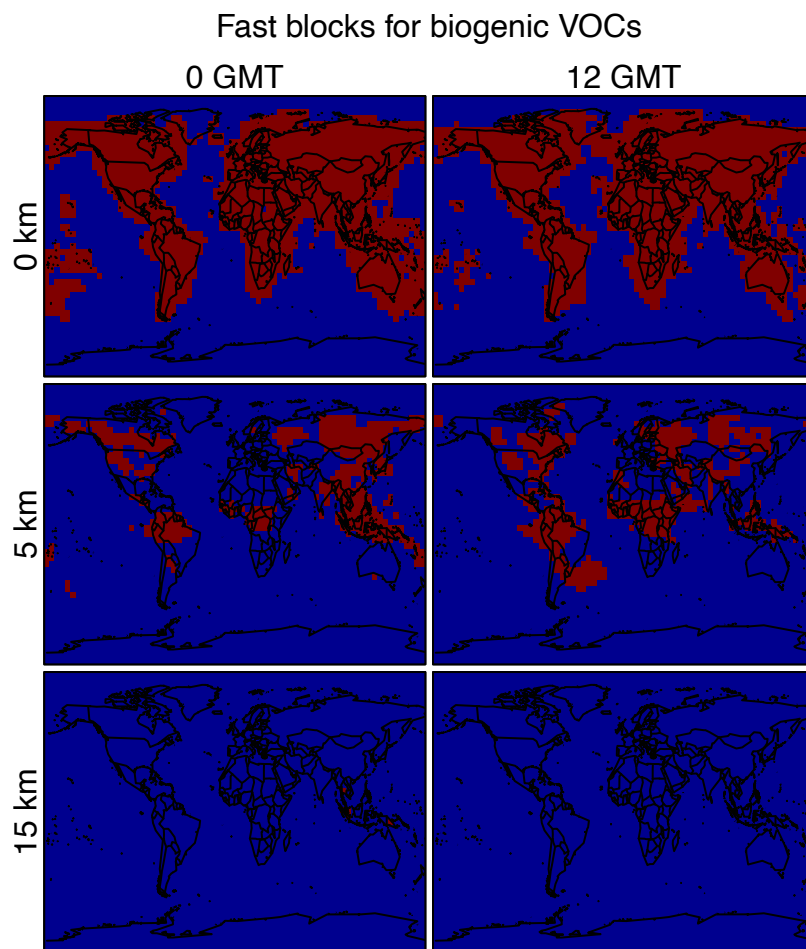

8  
 9 **Fig. S2.** Locations of biogenic blocks (block 8-11) that needs to be solved as fast (red). If any of block 8-11 is fast, the gridbox  
 10 will be labeled as red. Results are shown on August 1 2013 at 0 and 12 GMT using a threshold  $\delta$  of  $500 \text{ molecules cm}^{-3} \text{ s}^{-1}$  to  
 11 define the fast and slow species, and a lifetime of 10 days to define the short-lived and long-lived species.

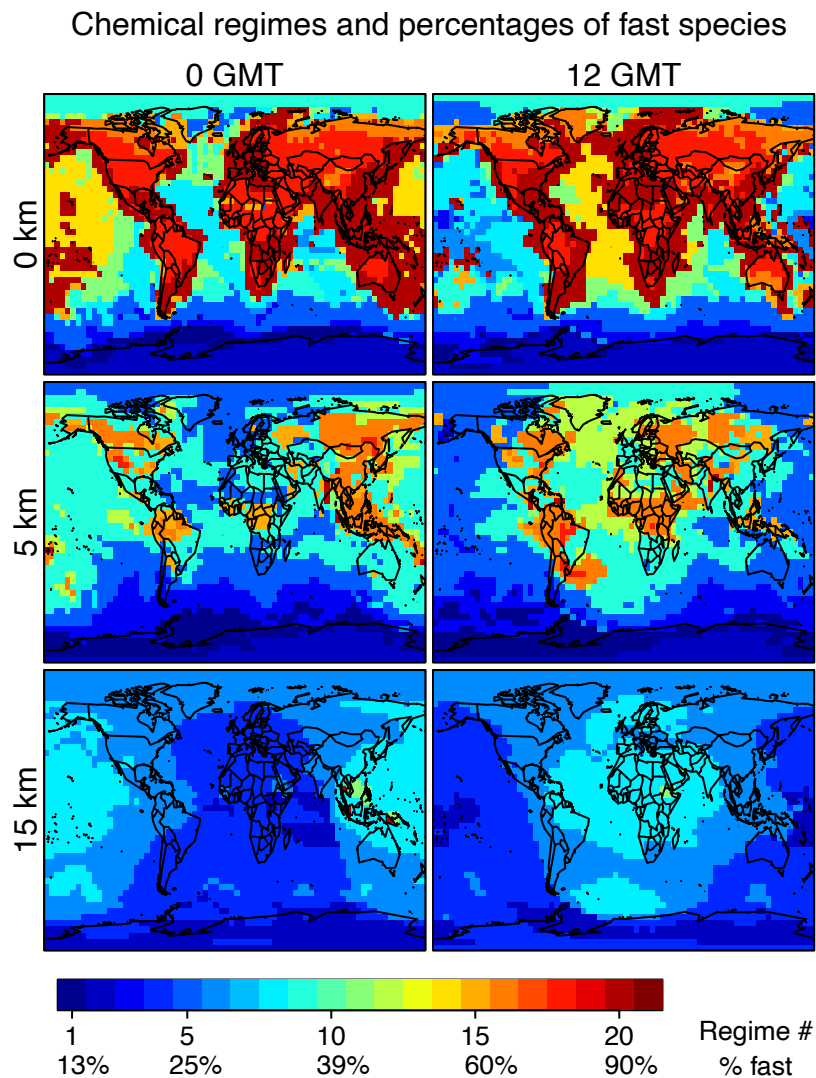

12

13 **Fig. S3.** Chemical mechanism complexity used in the adaptive chemical mechanism in different regions of the atmosphere. The  
14 Figure identifies the submechanism from Fig. 5 needed to simulate a given GEOS-Chem gridbox on August 1 2013 at 0 and 12  
15 GMT. The percentage of species treated as fast in that chemical regime is shown on the colorbar and more details are in Table  
16 1. The 21<sup>st</sup> chemical regime is the full chemical mechanism. We use a threshold  $\delta$  of  $500 \text{ molecules cm}^{-3} \text{ s}^{-1}$  to partition the fast  
17 and slow species.

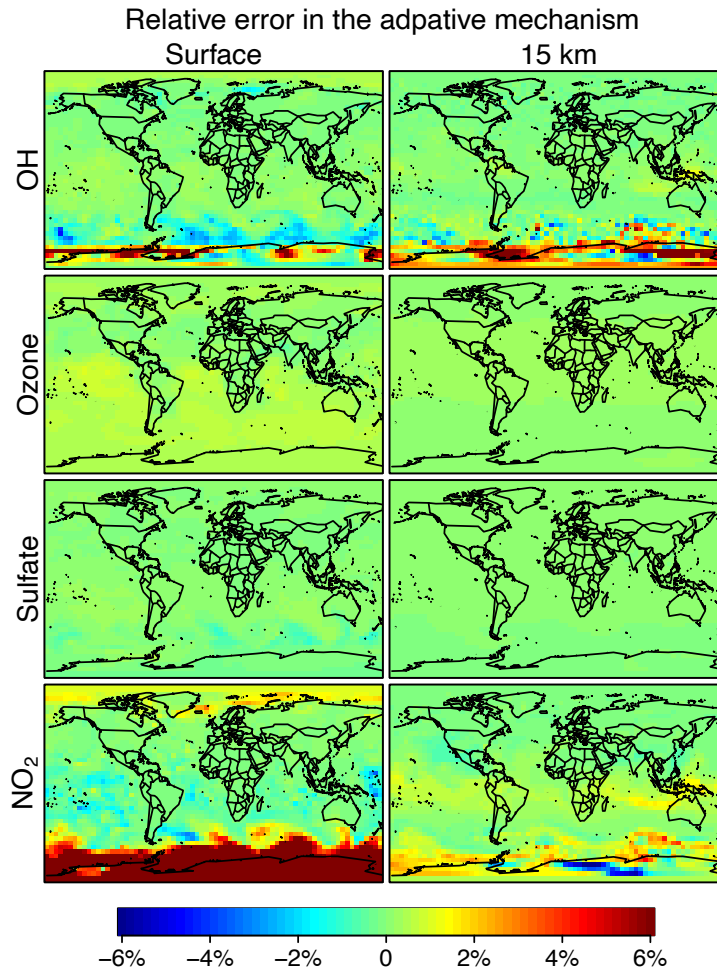

18

19 **Fig. S4.** Relative error from the adaptive mechanism reduction method after three years of simulation in the GEOS-Chem global  
 20 3-D model for tropospheric-stratospheric chemistry. The figure shows relative differences of 24-h average OH, ozone, sulfate  
 21 and NO<sub>2</sub> concentrations relative to the full-chemistry simulation on the last day of the three-year simulation. The calculation  
 22 removes slow ( $P$  and  $L < 1500 \text{ molecules cm}^{-3} \text{ s}^{-1}$ ) and slow reactions ( $\text{rate} < 10 \text{ molecules cm}^{-3} \text{ s}^{-1}$ ). The number of blocks ( $N$ )  
 23 is 13 and the number of chemical regimes ( $M$ ) is 20.

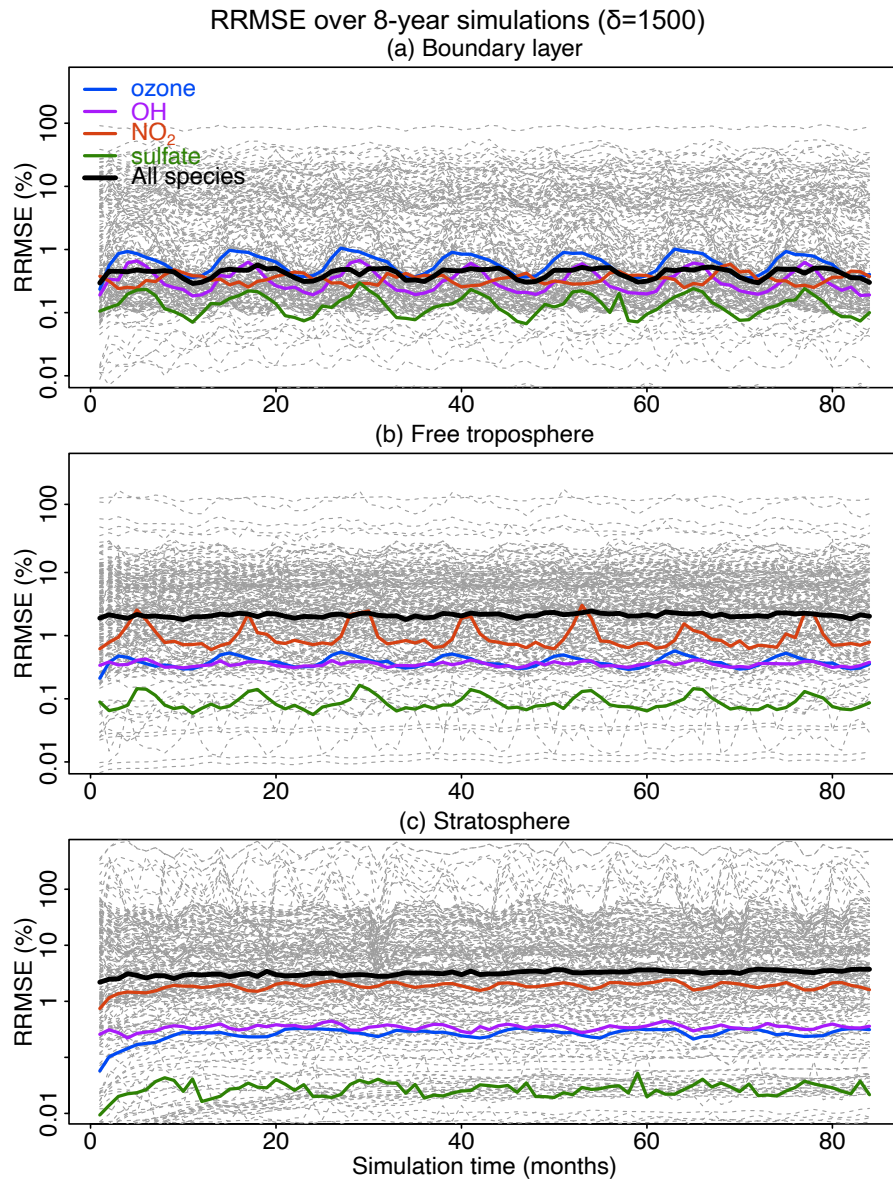

24

25 **Fig. S5.** Same as Figure 7 but we calculate the RRMSE by accounting for gridboxes that can comprise 99% mass in each  
 26 atmospheric domain (the 99% thresholds are different in different domains in this case), including the (a) boundary layer, (b)  
 27 free troposphere, and (c) stratosphere.

28

Relative differences of atmospheric masses for different species categories

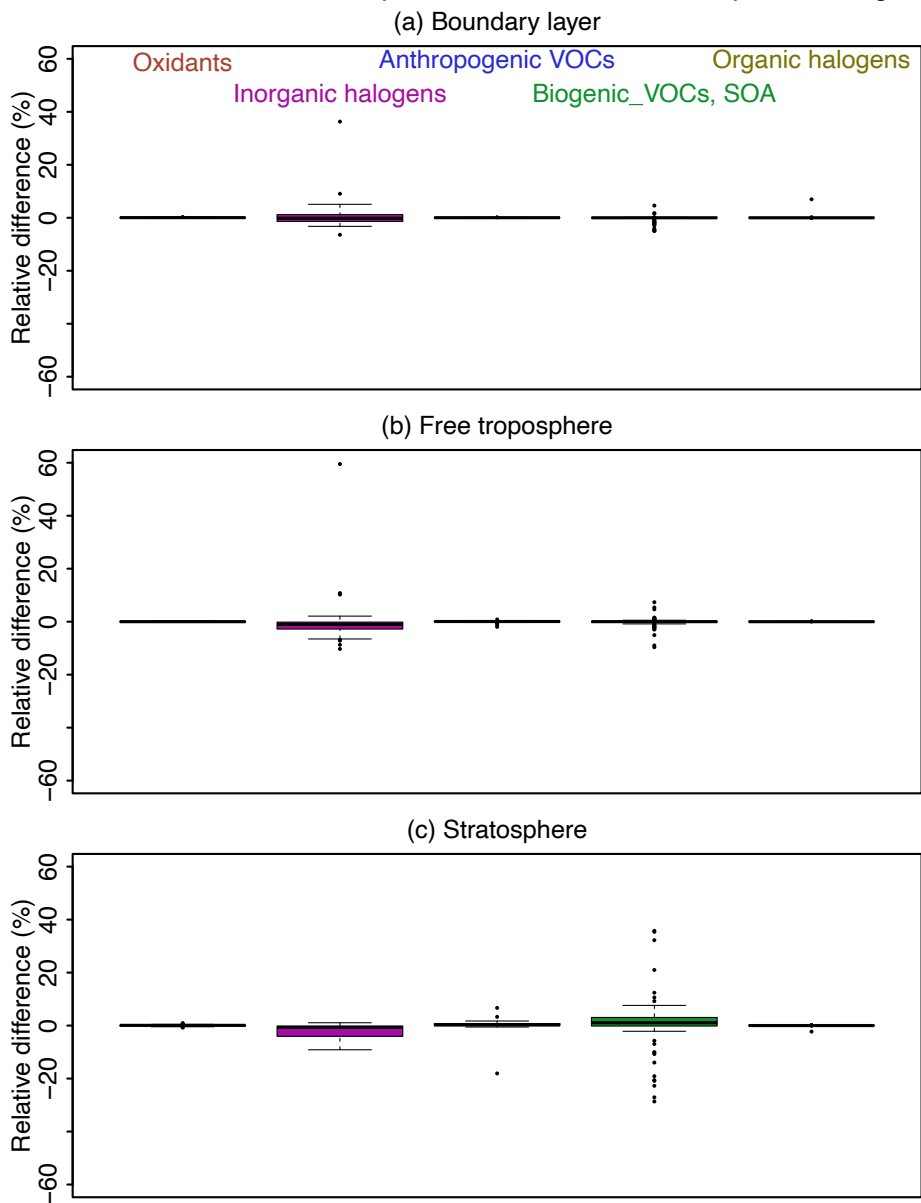

29  
30  
31  
32  
33  
34

**Fig. S6.** The relative differences of atmospheric mass (averaged in the 8-year simulations) in the adaptive reduced chemistry mechanism for different species categories in the (a) boundary layer, (b) free troposphere, and (c) stratosphere. The top and bottom of each box are the 25th and 75th percentile, and the centerline is the 50th percentile. We use a threshold  $\delta$  of 1500 molecules  $\text{cm}^{-3} \text{s}^{-1}$  to separate fast and slow species here.

Relative differences of atmospheric masses for different species categories

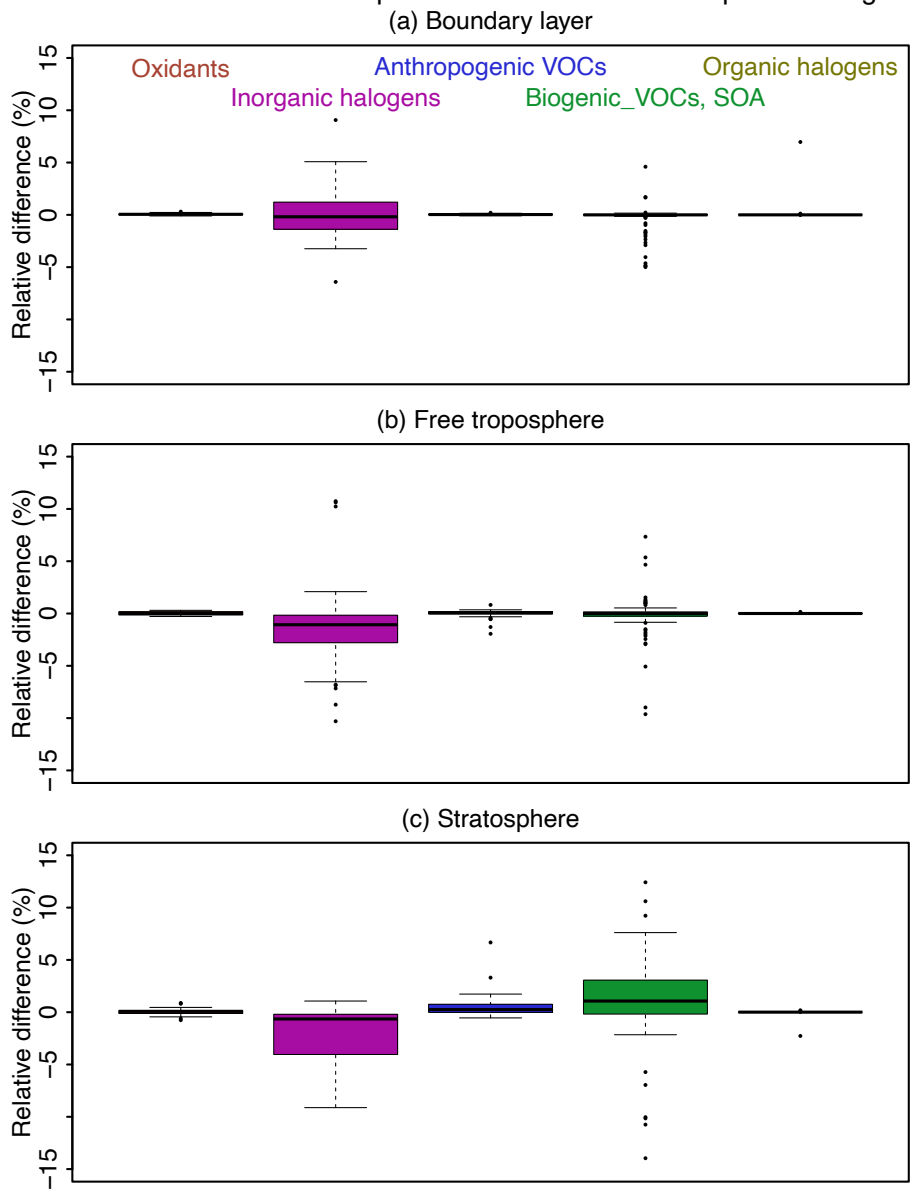

35  
36  
37

**Fig. S7.** Same as Fig. S6 but we present more details for the data from -15% to 15%.

Relative differences of atmospheric masses over 8-year simulations ( $\delta=1500$ )  
(a) Boundary layer

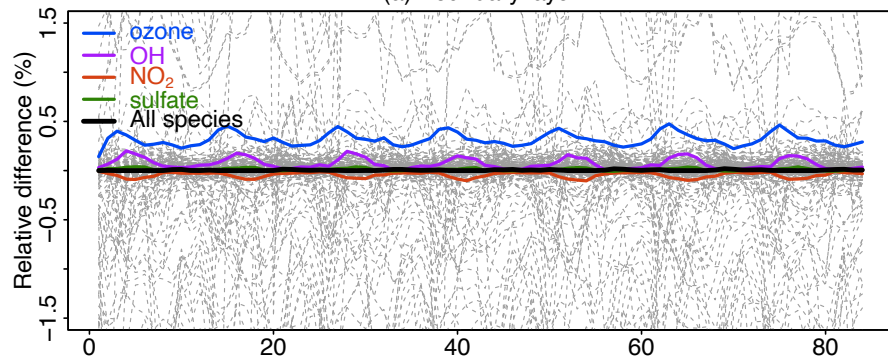

(b) Free troposphere

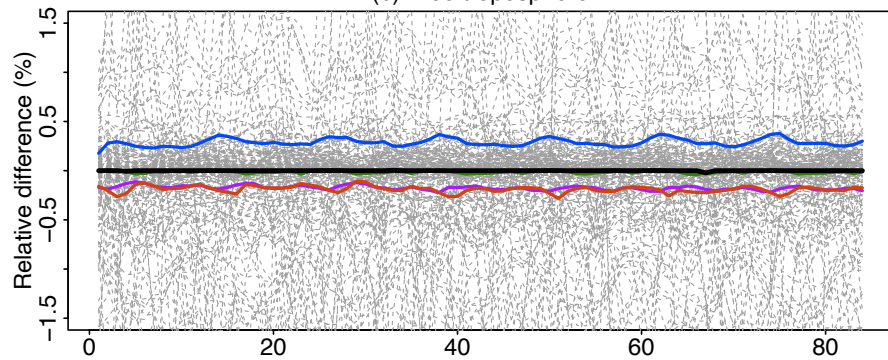

(c) Stratosphere

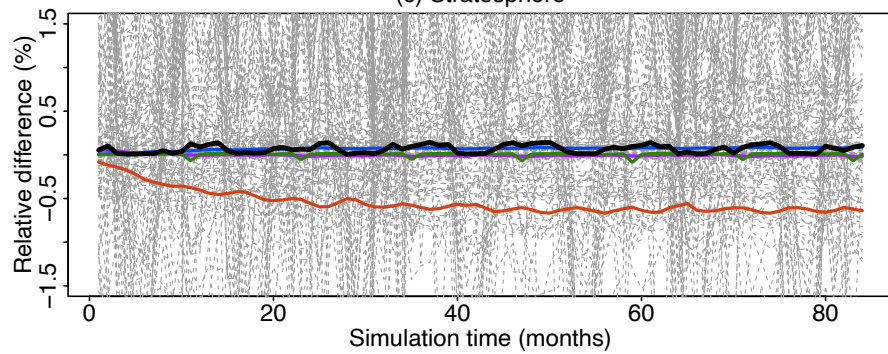

38

39 **Fig. S8.** Same as Figure 8 but for more details in the range between -1.5% and 1.5%. Results are also shown for the median  
40 relative difference across all species in the mechanism and more specifically for ozone, OH, NO<sub>2</sub>, and sulfate.

41



Diagram for adding new species into the mechanism

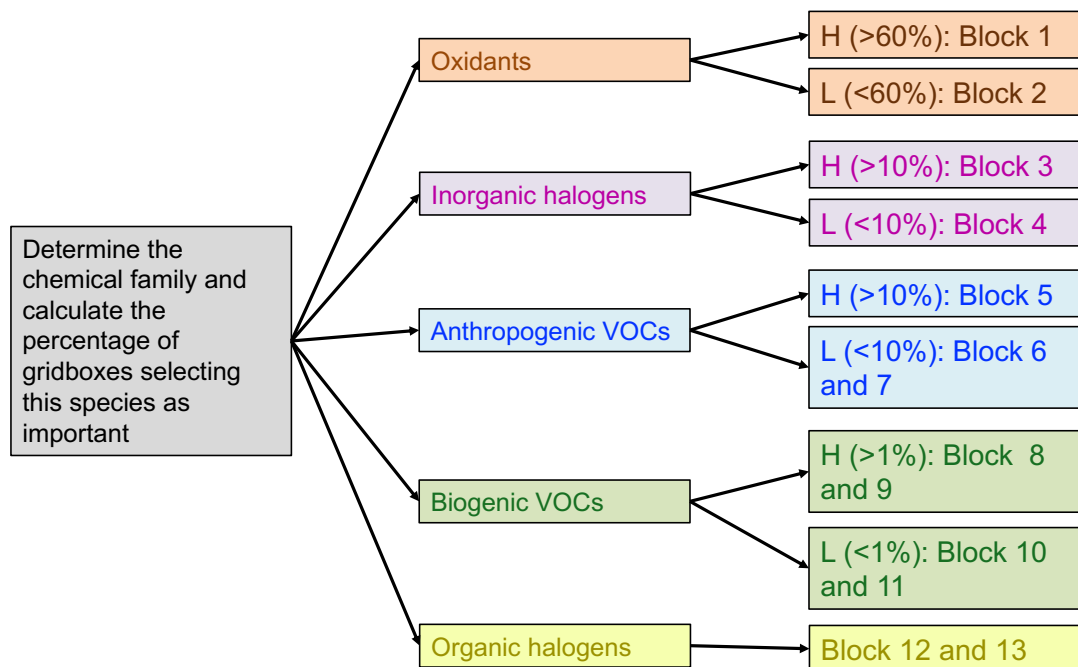

42

43 **Fig. S9.** Diagram of adding a new species to the mechanism. The location of the species is determined by its chemical family  
44 and the percentage of gridboxes (in parentheses in the last column) that select this species as fast. 'H' ('L') means higher (lower)  
45 percentage of gridboxes that consider this species as fast. We use a threshold of  $500 \text{ molecules cm}^{-3} \text{ s}^{-1}$  to partition fast and slow  
46 species.

47

48

49 **Table S1.** Top 10% Species with highest RRMSE and relative mass bias in the boundary layer, free troposphere and  
 50 stratosphere\* .

|                  | RRMSE                                                                                                                                    | Relative mass bias                                                                                                                                  |
|------------------|------------------------------------------------------------------------------------------------------------------------------------------|-----------------------------------------------------------------------------------------------------------------------------------------------------|
| Boundary layer   | I2O4, I2O2, I2O3, IBr, INO, ICl, IONO, OIO, PRPN, HOI, BrSALC, BrSALA, ISNOHOO, IONO2, ISNOOB, I2, PRN1, MAN2, MACRN, MAOPO2, IO         | I2O2, I2O3, INO, TRO2, N, XRO2, Cl2O2, IONO, OIO, PRPN, Br2, BrSALC, BrSALA, ISNOHOO, IONO2, ISNOOB, I2, Cl2, PRN1, MAN2, MACRN, MAOPO2             |
| Free troposphere | ISN1OG, I2O4, I2O2, I2O3, INO, ICl, OIO, PRPN, BrSALA, MAOP, ISNOHOO, ISNOOB, I2, PRN1, MAN2, ISNOOA, MACRN, MAOPO2, I, IO, NMAO3, INO2  | AERI, ISN1OG, I2O4, I2O2, I2O3, INO, HI, IONO, OIO, HOI, BrSALC, BrSALA, ISNOHOO, ISNOOB, I2, Cl2, PRN1, MAN2, MACRN, I, IO, NMAO3                  |
| Stratosphere     | ISN1OA, ISN1OG, LVOC, PMNN, MRP, IPMN, MACRNO2, MONITS, GAOO, MVKN, MGLYOO, GLYX, MGLOO, MAN2, MACRN, HCOOH, KO2, MGLY, RIO2, INO2, MRO2 | ISN1OA, ISN1OG, DHDC, PRPN, DHPCARP, ISNOHOO, ISNOOB, INPN, I2, PRN1, PROPNN, MAN2, ISNOOA, MACRN, MAOPO2, OLND, OLNN, KO2, NMAO3, ISN1, RIO2, INO2 |

51 \*The full GEOS-Chem mechanism has 228 species. The full names of these acronyms can be found at  
 52 [http://wiki.seas.harvard.edu/geos-chem/index.php/Species\\_in\\_GEOS-Chem](http://wiki.seas.harvard.edu/geos-chem/index.php/Species_in_GEOS-Chem).  
 53

54  
 55
